# Supplementary material for: Helicase-like transcription factor-deletion from the tumor microenvironment in a cell line-derived xenograft model of colorectal cancer reprogrammed the human transcriptome-S-nitroso-proteome to promote inflammation and redirect metastasis
Source: PLoS One. 2021 May 19;16(5):e0251132. doi: 10.1371/journal.pone.0251132 (PMC8133447; doi:10.1371/journal.pone.0251132)
Supplement: S1 Table — Cuffdiff, part of Cufflinks, uses RPKM values to calculate changes in gene expression. Cuffdiff data were input into iPathwayGuide. Met-analysis calculated long fold change (logFC) and an adjusted p-value (adjpv) for each comparison. The minus sign in the column for logFC shows 12 genes were downregulated and 18 genes were upregulated. (XLSX) [file pone.0251132.s002.xlsx]

## Sheet: IPG_rep41040_c50425_geneTable-1
symbol	entrez	logfc	adjpv
Arg1	383	3.11656	0.0238583
Dio3	1735	-2.55892	0.0238583
Cxcl1	2919	3.06225	0.0238583
Cxcl2	2920	3.87349	0.0238583
Il6	3569	2.9152	0.0238583
Lep	3952	-10	0.0238583
Mmp8	4317	3.48797	0.0238583
Nos2	4843	2.42082	0.0238583
Serpinb2	5055	2.76847	0.0238583
Plin1	5346	-10	0.0238583
S100a8	6279	3.74902	0.0238583
S100a9	6280	3.77117	0.0238583
Ccl8	6355	-2.86214	0.0238583
Sfrp2	6423	-2.35118	0.0238583
Slpi	6590	3.1923	0.0238583
Il1r2	7850	2.72152	0.0238583
Wisp2	8839	-2.30914	0.0238583
Per3	8863	-1.99241	0.0238583
Per2	8864	-2.16094	0.0238583
Cxcl13	10563	3.35666	0.0238583
Slc7a11	23657	3.12038	0.0238583
Pde11a	50940	2.57877	0.0238583
Tnip3	79931	2.57326	0.0238583
Svep1	79987	-1.74569	0.0238583
Pi16	221476	-2.31729	0.0238583
Cxcl9	4283	-2.74191	0.0397639
Slc9a3	6550	-2.7834	0.0397639
Duox2	50506	2.7397	0.0397639
Trem1	54210	2.21253	0.0397639
Tnn	63923	2.45144	0.0397639
